# Supplementary material for: Valorization of heavy metal enriched phytoremediation biomass using a deep eutectic solvent (DES)
Source: Royal Society of Chemistry journal article supplement (doi:10.1039/d2gc04190a), 2022-12-30
Supplement: d2gc04190a1.pdf [file d2gc04190a1.pdf]

## **Valorization of heavy metal enriched phytoremediation biomass using deep eutectic solvent (DES)**

*Chenyuan Zhang<sup>a,b,c</sup>, Xianpeng Yang<sup>c</sup>, Shuang Yang<sup>a,b,c</sup>, Zhongqi Liu<sup>a,b,c</sup>, Lei Zhang<sup>c</sup>,  
Hailong He<sup>c</sup>, Wenmin Qiu<sup>d</sup>, Renying Zhuo<sup>d</sup>, Jing Xu<sup>d\*</sup> and Lei Wang<sup>b,c,\*</sup>*

*<sup>a</sup> College of Environmental and Resource Sciences, Zhejiang University, Hangzhou 310058,  
Zhejiang Province, China*

*<sup>b</sup> Key Laboratory of Coastal Environment and Resources of Zhejiang Province, School of  
Engineering, Westlake University, 18 Shilongshan Road, Hangzhou 310024, China*

*<sup>c</sup> Institute of Advanced Technology, Westlake Institute for Advanced Study, 18 Shilongshan Road,  
Hangzhou 310024, Zhejiang Province, China.*

*<sup>d</sup> State Key Laboratory of Tree Genetics and Breeding, Key Laboratory of Tree Breeding of Zhejiang  
Province, Research Institute of Subtropical Forestry, Chinese Academy of Forestry, 73 Daqiao  
Road, Hangzhou 311400, Zhejiang Province, China.*

*Corresponding author at: School of Engineering, Westlake University, 18 Shilongshan Road,  
Hangzhou 310024, Zhejiang Province, China.*

*E-mail address: [wang\\_lei@westlake.edu.cn](mailto:wang_lei@westlake.edu.cn)*

### **Captions**

Total Number of pages: 6

Total Number of tables: 7

Total Number of figures: 6

**Table S1** Effects of DES pretreatment on chemical composition of untreated poplar and pulp

| <b>Composition of untreated poplar or pulp based on the original sample before pretreatment (%)</b> |     |            |           |               |          |
|-----------------------------------------------------------------------------------------------------|-----|------------|-----------|---------------|----------|
|                                                                                                     |     | Pulp yield | Cellulose | Hemicellulose | Lignin   |
| Poplar                                                                                              |     | N/A        | 48.1±0.6  | 16.0±1.5      | 28.2±1.0 |
| 120 °C                                                                                              | 1 h | 54.6±1.6   | 34.1±1.4  | 6.6±0.8       | 9.5±0.8  |
|                                                                                                     | 3 h | 43.8±1.5   | 31.1±1.6  | 4.4±0.5       | 4.1±0.3  |
|                                                                                                     | 5 h | 39.8±0.8   | 29.8±0.7  | 3.7±0.1       | 2.9±0.2  |
| 130 °C                                                                                              | 1 h | 44.6±1.6   | 33.0±1.5  | 4.9±0.4       | 4.9±1.1  |
|                                                                                                     | 3 h | 37.3±1.6   | 29.8±0.8  | 3.0±0.4       | 1.9±0.5  |
|                                                                                                     | 5 h | 36.1±1.2   | 29.5±0.6  | 2.0±0.4       | 2.0±0.1  |

**Table S2** Content of Cd in biomass samples and liquid phase after poplar pretreatment

|        |     | <b>Cd proportion (% of total)</b> |        |          | <b>Cd concentration (ppm)</b> |         |        |         |
|--------|-----|-----------------------------------|--------|----------|-------------------------------|---------|--------|---------|
|        |     | Pulp                              | Lignin | Liquid   | Loss                          | Pulp    | Lignin | Liquid  |
| Poplar |     | 100                               | N/A    | N/A      | N/A                           | 3.3±0.4 | N/A    | N/A     |
| 120 °C | 1 h | 4.5±0.8                           | N/A    | 88.9±1.6 | 6.5±1.9                       | 0.3±0.1 | N/A    | 0.3±0.0 |
|        | 3 h | 3.0±0.6                           | N/A    | 90.2±2.8 | 6.7±3.3                       | 0.2±0.1 | N/A    | 0.3±0.0 |
|        | 5 h | 2.4±0.4                           | N/A    | 94.5±2.5 | 2.8±2.2                       | 0.2±0.0 | N/A    | 0.3±0.0 |
| 130 °C | 1 h | 3.0±1.0                           | N/A    | 93.5±0.8 | 2.9±0.2                       | 0.2±0.1 | N/A    | 0.3±0.0 |
|        | 3 h | 2.1±0.5                           | N/A    | 91.3±1.3 | 6.4±0.9                       | 0.2±0.0 | N/A    | 0.3±0.0 |
|        | 5 h | 1.7±0.6                           | N/A    | 92.0±1.1 | 6.2±2.2                       | 0.1±0.0 | N/A    | 0.3±0.0 |

N/A: Below the detection limit.

Note: The loss mainly comes from the detection error and the loss in the experiment.

**Table S3** Content of Cu in biomass samples and liquid phase after poplar pretreatment

|        |     | <b>Cu proportion (% of total)</b> |         |          | <b>Cu concentration (ppm)</b> |          |         |         |
|--------|-----|-----------------------------------|---------|----------|-------------------------------|----------|---------|---------|
|        |     | Pulp                              | Lignin  | Liquid   | Loss                          | Pulp     | Lignin  | Liquid  |
| Poplar |     | 100                               | N/A     | N/A      | N/A                           | 9.5±0.72 | N/A     | N/A     |
| 120 °C | 1 h | 0.6±0.4                           | 0.8±0.1 | 91.9±1.3 | 6.8±1.0                       | 0.1±0.06 | 0.9±0.0 | 0.7±0.0 |
|        | 3 h | 0.5±0.7                           | 2.2±0.1 | 89.5±2.1 | 8.0±1.7                       | 0.1±0.05 | 1.3±0.0 | 0.7±0.0 |
|        | 5 h | 0.3±0.2                           | 2.9±1.0 | 87.7±2.4 | 9.1±1.1                       | 0.1±0.06 | 1.5±0.1 | 0.7±0.0 |
| 130 °C | 1 h | 0.4±0.4                           | 1.2±0.3 | 88.3±1.4 | 10.2±1.2                      | 0.1±0.11 | 0.8±0.0 | 0.7±0.0 |
|        | 3 h | 0.4±0.4                           | 3.8±0.1 | 85.5±1.9 | 10.4±1.5                      | 0.1±0.11 | 1.8±0.0 | 0.7±0.0 |
|        | 5 h | 0.4±0.2                           | 6.0±0.2 | 82.9±1.0 | 10.4±0.6                      | 0.1±0.05 | 2.4±0.0 | 0.6±0.0 |

N/A: Below the detection limit.

Note: The loss mainly comes from the detection error and the loss in the experiment.

**Table S4** Semi-quantitative information for subunits and interunit linkage in lignin

|        |     | <b>β-O-4 %</b> | <b>β-β %</b> | <b>β-5 %</b> | <b>S/G</b> |
|--------|-----|----------------|--------------|--------------|------------|
| MWL    |     | 50.1           | 8.4          | 4.7          | 0.9        |
| 120 °C | 1 h | 10.4           | 2.6          | 3.1          | 1.4        |
|        | 3 h | 3.0            | 2.0          | 1.0          | 1.6        |
|        | 5 h | 2.3            | 3.1          | 1.5          | 1.7        |
| 130 °C | 1 h | 2.4            | 1.0          | N/A          | 1.9        |
|        | 3 h | 2.2            | 1.7          | N/A          | 1.6        |
|        | 5 h | 1.7            | 2.5          | N/A          | 1.8        |

N/A: Below the detection limit.

**Table S5** Functional group contents of lignin from different pretreatment conditions (mmol/g)

|        |     | Aliphatic OH | C <sub>5</sub> substituted OH | Guaiacyl OH | P-hydroxy OH | Carboxylic acid OH | Total phenolic OH |
|--------|-----|--------------|-------------------------------|-------------|--------------|--------------------|-------------------|
| MWL    |     | 4.95         | 0.07                          | 0.84        | 0.43         | 0.08               | 1.34              |
| 120 °C | 1 h | 2.21         | 1.13                          | 0.73        | 0.20         | 0.50               | 2.06              |
|        | 3 h | 1.78         | 1.54                          | 0.79        | 0.23         | 0.45               | 2.56              |
|        | 5 h | 1.40         | 1.72                          | 0.86        | 0.19         | 0.57               | 2.76              |
| 130 °C | 1 h | 1.93         | 1.51                          | 0.90        | 0.20         | 0.36               | 2.51              |
|        | 3 h | 1.75         | 1.75                          | 0.90        | 0.24         | 0.75               | 2.90              |
|        | 5 h | 0.73         | 1.87                          | 0.99        | 0.20         | 0.51               | 3.05              |

**Table S6** The influence of the water content on the electrochemical properties of DES

| Water contents wt% | Conductivity (ms/cm) | Cathodic limiting potential (V) | Anodic limiting potential (V) | Electrochemical window |
|--------------------|----------------------|---------------------------------|-------------------------------|------------------------|
| 0                  | 0.5                  | -1.91                           | 1.64                          | 3.53                   |
| 10                 | 1.8                  | -1.83                           | 1.59                          | 3.42                   |
| 20                 | 4.0                  | -1.76                           | 1.56                          | 3.32                   |
| 30                 | 4.9                  | -1.63                           | 1.56                          | 3.19                   |

**Table S7** Content of HMs in biomass samples and liquid phase after *Sedum alfredii* pretreatment

|                       | HMs proportion (% of total) |          |          | HMs concentration (ppm) |            |          |
|-----------------------|-----------------------------|----------|----------|-------------------------|------------|----------|
|                       | Cd                          | Pb       | Cu       | Cd                      | Pb         | Cu       |
| <i>Sedum alfredii</i> | 100                         | 100      | 100      | 599.2±0.9               | 166.1±2.4  | 5.3±0.1  |
| Pulp                  | 3.5±0.5                     | 22.7±2.6 | 14.7±1.6 | 90.8±7.8                | 165.9±14.9 | 3.4±0.5  |
| 130 °C 3 h            |                             |          |          |                         |            |          |
| Lignin                | N/A                         | 0.2±0.0  | 55.8±2.5 | N/A                     | 3.8±0.4    | 28.2±2.9 |
| Liquid                | 93.1±0.7                    | 76.7±0.3 | 22.7±2.9 | 44.7±0.3                | 10.2±0.1   | 0.1±0.0  |
| Loss                  | 3.3±0.8                     | 0.6±0.2  | 8.6±1.6  | N/A                     | N/A        | N/A      |

N/A: Below the detection limit.

Note: The loss mainly comes from the detection error and the loss in the experiment.

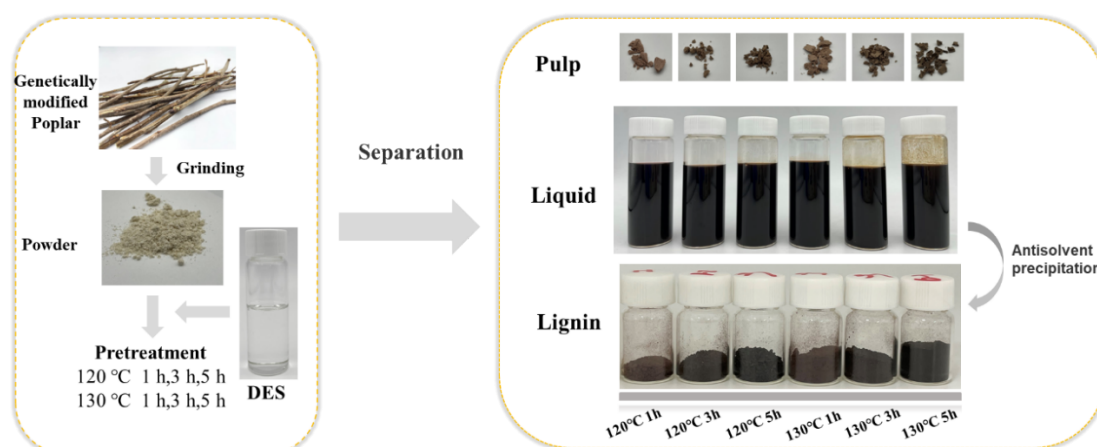**Fig. S1** Procedure for the pretreated genetically modified poplar and extracted lignin.

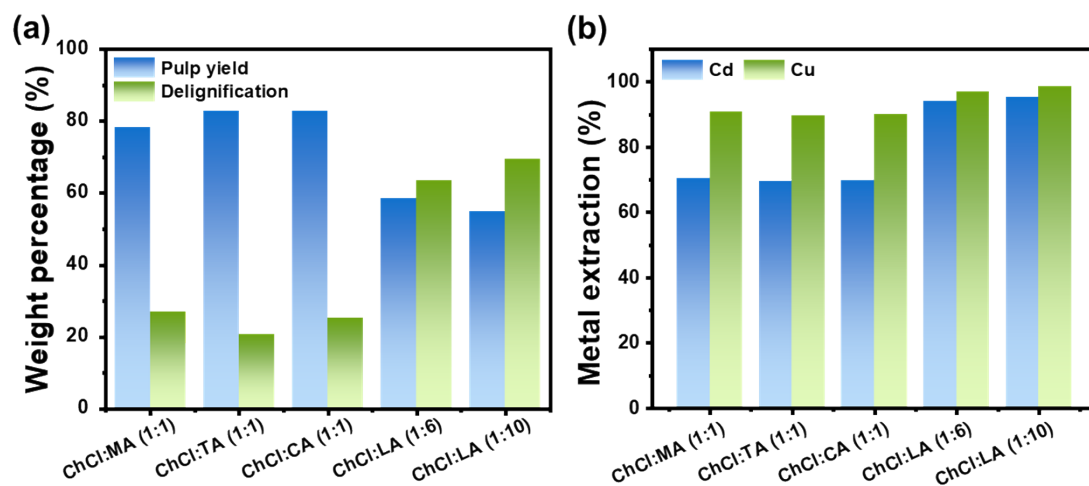

**Fig. S2** Pretreatment of genetically modified poplar with different DES at 120 °C for 1 h. (a) Pulp yield and lignin removal efficiency; (b) Effect of different DES on heavy metal extraction efficiency in the gene modified poplar.

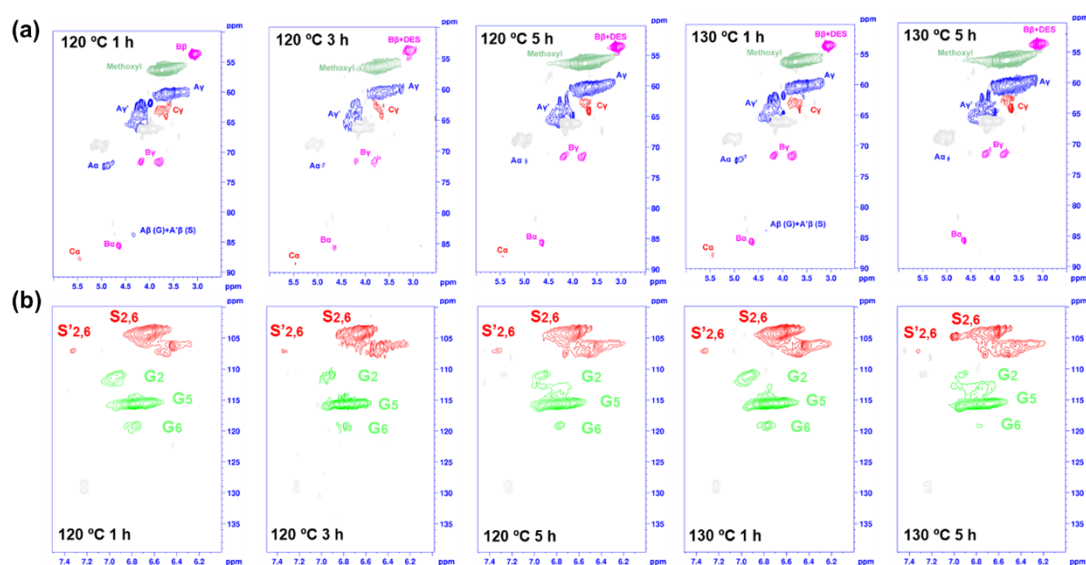

**Fig. S3** 2D HSQC NMR characterization of lignin obtained with different pretreatment conditions: (a) Side-chain regions; (b) Aromatic regions.

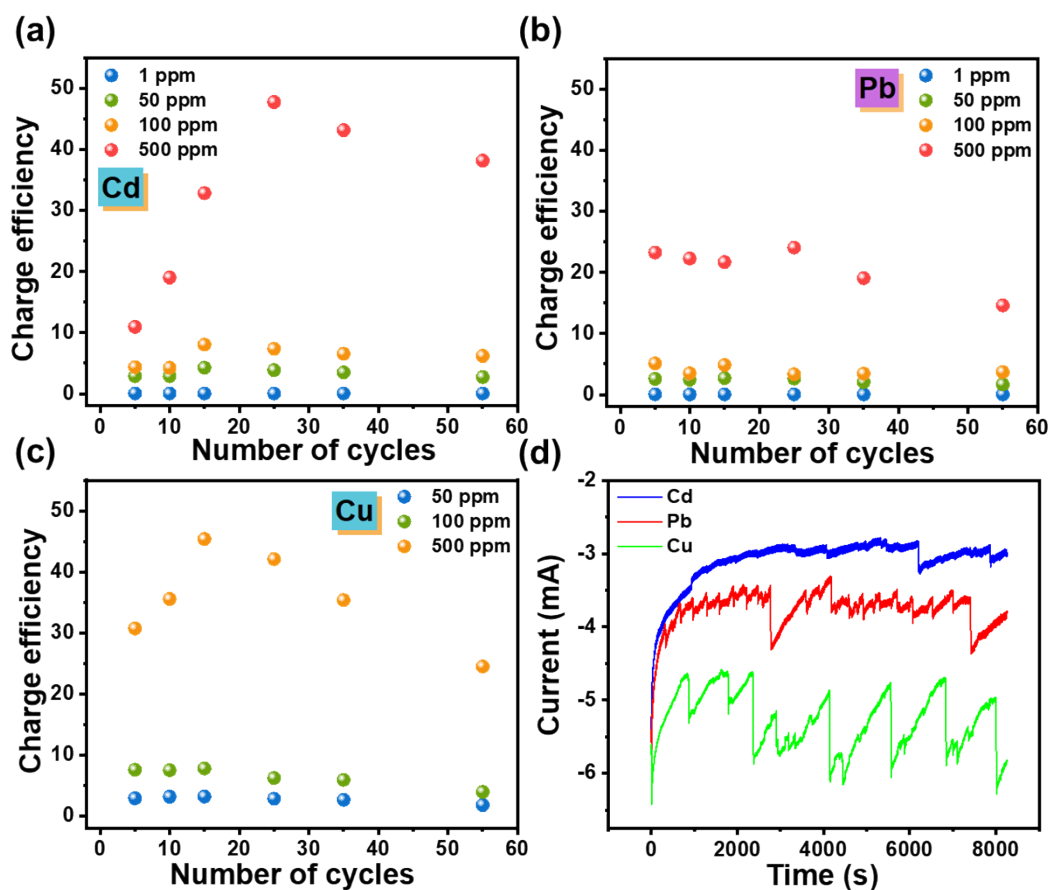

**Fig. S4** (a-c) The charge efficiency of Cd, Pb and Cu from DES (20 wt% H<sub>2</sub>O) with different content pollution by electrochemical deposition. All three solutions only contain a single contaminant. Potential applied -1.4 V vs Ag/AgCl; (d) Current curve of Cd, Pb and Cu of 100 ppm initially from DES (20 wt% H<sub>2</sub>O) using electrodeposition method.

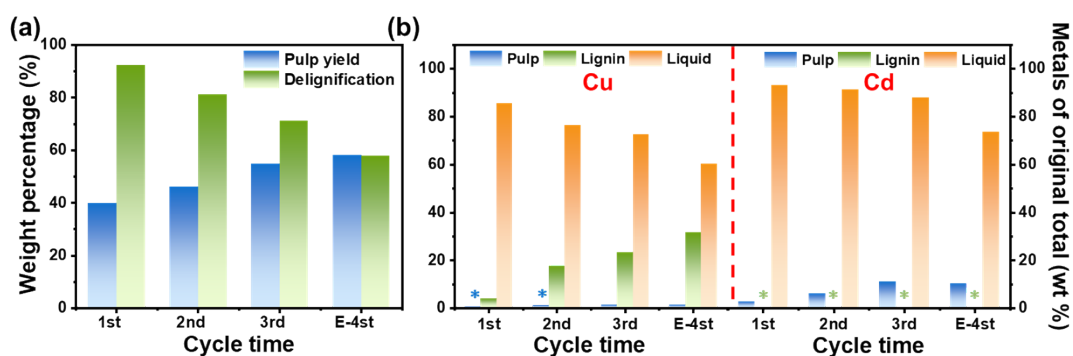

**Fig. S5**(a) Pulp yield and delignification efficiency after various cycles of DES treatment at 130 °C for 3 h; (b) Distribution of heavy metals in various components of poplar after DES pretreatment. \*: not detected. E-4st refers to the DES treatment of poplar at 130 °C for 3 h using electrodeposited DES (Electrodeposited DES was obtained from the 3<sup>rd</sup> DES after electrodeposition).

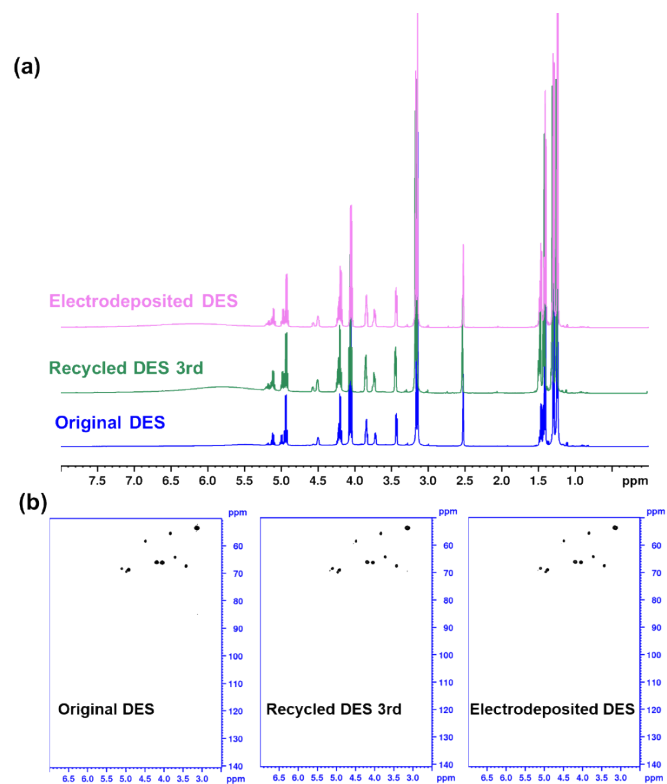

**Fig. S6** (a)  $^1\text{H}$  NMR spectra of original, the recycled DES and electrodeposited DES. (b) 2D-HSQC NMR spectra of the original, recycled DES after three cycles and electrodeposited DES.
